# Supplementary material
Source: MDPI journal article supplement (https://www.mdpi.com/1424-8247/16/3/469)
Supplement: s1 [file s1]

## Supporting Information

### Amphiphilic Cyclic Cell-Penetrating Peptides Containing Tryptophan and Arginine as Protein Delivery Agents

**Jonathan Moreno<sup>1,†</sup>, Khalid Zoghebi<sup>1,2,†</sup>, David Salehi<sup>1</sup>, Lois Kim<sup>1</sup>, Sorour Khayyatnejad Shoushtari<sup>1</sup>, Rakesh K Tiwari<sup>1</sup>, Keykavous Parang<sup>1\*</sup>**

<sup>1</sup>Center for Targeted Drug Delivery, Department of Biomedical and Pharmaceutical Sciences, Chapman University School of Pharmacy, Harry and Diane Rinker Health Science Campus, Irvine, CA 92618, United States; jonmoreno@chapman.edu (J.M.); zoghebi@chapman.edu (K.Z.); dsalehi@chapman.edu (D.S.); lokim@chapman.edu (L. K.); khayyatnejadshoushta@chapman.edu (S.K.S.); tiwari@chapman.edu (R.K.T.); parang@chapman.edu (K.P.)

<sup>2</sup>Department of Pharmaceutical Chemistry, College of Pharmacy, Jazan University, Jazan 82826, Saudi Arabia; Kzoghebi@jazanu.edu.sa

#### Corresponding Author

Keykavous Parang – Center for Targeted Drug Delivery, Department of Biomedical and Pharmaceutical Sciences, Chapman University School of Pharmacy, Irvine, California 92618, United States; orcid.org/0000-0001-8600-0893; Phone: +1-714-516-5489; Email: parang@chapman.edu; Fax: +1-714-516-5481.

<sup>†</sup>These authors contributed equally.

| Table of Contents                                                                                                                                                                                                                                 | Page |
|---------------------------------------------------------------------------------------------------------------------------------------------------------------------------------------------------------------------------------------------------|------|
| <b>Table S1.</b> Cytotoxicity of [WR] <sub>9</sub> with GFP (50 nM) physical mixtures.                                                                                                                                                            | S4   |
| <b>Table S2.</b> Cytotoxicity of [WR] <sub>9</sub> with RFP (50 nM) at different peptide concentrations.                                                                                                                                          | S5   |
| <b>Table S3.</b> Cytotoxicity of [DipR] <sub>5</sub> , [WWRR] <sub>4</sub> , and [WWRR] <sub>5</sub> with GFP (50 nM) at different peptide concentrations (1-10 µM) in breast cancer (MDA-MB-231) cell line after 3 h as determined by MTS assay. | S6   |
| <b>Figure S1.</b> Cytotoxicity of cyclic peptides [WWRR] <sub>4</sub> and [WWRR] <sub>5</sub> with GFP (50 nM) complexes at different peptide concentrations (1-10 µM) in breast cancer (MDA-MB-231) cell line after 3 h.                         | S6   |
| <b>Table S4.</b> Cytotoxicity of [WR] <sub>9</sub> (3 µM) with increasing GFP concentrations (100 nM – 500 nM) in breast cancer (MDA-MB-231) cell line after 24 h as determined by MTS assay.                                                     | S7   |
| <b>Figure S2.</b> Cytotoxicity of [WR] <sub>9</sub> (3 µM) with increasing GFP concentrations (100 nM – 500 nM) in breast cancer (MDA-MB-231) cell line after 24 h as determined by MTS assay.                                                    | S7   |
| <b>Table S5.</b> Cytotoxicity of [DipR] <sub>5</sub> (10 µM) with increasing GFP concentrations (100 nM – 500 nM) in breast cancer (MDA-MB-231) cell line after 3 h as determined by MTS assay.                                                   | S8   |
| <b>Figure S3.</b> Cytotoxicity of [DipR] <sub>5</sub> (10 µM) with increasing GFP concentrations (100 nM – 500 nM) in breast cancer (MDA-MB-231) cell line after 3 h as determined by MTS assay.                                                  | S8   |
| <b>Figure S4.</b> Confocal microscopy images of MDA-MB-231 cells incubated with GFP-[WR] <sub>4</sub> mixture at a peptide concentration ranging (1-10 µM) and GFP at (50 nM) for 3 h.                                                            | S9   |
| <b>Figure S5.</b> Confocal microscopy images of SK-OV-3 cells incubated with GFP-[WR] <sub>4</sub> mixture at a peptide concentration range (1-5 µM) and GFP at (50 nM) for 3 h.                                                                  | S10  |
| <b>Figure S6.</b> Confocal microscopy images of MDA-MB-231 cells incubated with GFP-[R <sub>5</sub> K]W <sub>7</sub> mixture at a peptide concentration range (1-5 µM) and GFP at (50 nM) for 3 h.                                                | S11  |
| <b>Figure S7.</b> Confocal microscopy images of MDA-MB-231 cells incubated with GFP-[(RW) <sub>5</sub> K](RW) <sub>5</sub> mixture at a peptide concentration range (1-5 µM) and GFP at (50 nM) for 3 h.                                          | S12  |

|                                                                                                                                                                                       |     |
|---------------------------------------------------------------------------------------------------------------------------------------------------------------------------------------|-----|
| <b>Figure S8.</b> Confocal microscopy images of MDA-MB-231 cells incubated with GFP-[WWRR] <sub>4</sub> mixture at a peptide concentration range (1-6 µM) and GFP at (50 nM) for 3 h. | S13 |
| <b>Figure S9.</b> Confocal microscopy images of MDA-MB-231 cells incubated with GFP-[WWRR] <sub>5</sub> mixture at a peptide concentration range (1-5 µM) and GFP at (50 nM) for 3 h. | S14 |
| <b>Figure S10.</b> Improved delivery of RFP (50 nM) by F'-[DipR] <sub>5</sub> in MDA-MB-231 cells.                                                                                    | S15 |
| <b>Figure S11.</b> Cellular uptake study of GFP (50 nM) with [WR] <sub>9</sub> in the presence of endocytosis inhibitors in MDA-MB-231 cells after 3 h incubation.                    | S16 |
| <b>Figure S12.</b> Cellular uptake study of GFP (50 nM) with [DipR] <sub>5</sub> in the presence of endocytosis inhibitors in MDA-MB-231 cells after 3 h incubation.                  | S17 |

**Table S1.** Cytotoxicity of [WR]<sub>9</sub> with GFP (50 nM) at different peptide concentrations (1-20  $\mu$ M) in breast cancer (MDA-MB-231) cell line after 24 h as determined by MTS assay.

| Compound                                     | Cell Viability (%) after 24 h |
|----------------------------------------------|-------------------------------|
| Non-treated Cells                            | 100 $\pm$ 2                   |
| GFP (50 nM)                                  | 101 $\pm$ 3                   |
| GFP (50 nM) + [WR] <sub>9</sub> (1 $\mu$ M)  | 99 $\pm$ 2                    |
| GFP (50 nM) + [WR] <sub>9</sub> (5 $\mu$ M)  | 97 $\pm$ 5                    |
| GFP (50 nM) + [WR] <sub>9</sub> (10 $\mu$ M) | 94 $\pm$ 3                    |
| GFP (50 nM) + [WR] <sub>9</sub> (15 $\mu$ M) | 71 $\pm$ 2                    |
| GFP (50 nM) + [WR] <sub>9</sub> (20 $\mu$ M) | 60 $\pm$ 2                    |

**Table S2.** Cytotoxicity of [WR]<sub>9</sub> with RFP (50 nM) at different peptide concentrations (1-20 µM) in breast cancer (MDA-MB-231) cell line after 24 h, as determined by MTS assay.

| Compound                                | Cell Viability (%) after 24 h |
|-----------------------------------------|-------------------------------|
| Non-treated Cells                       | 100 ± 1                       |
| RFP (50 nM)                             | 98 ± 2                        |
| RFP (50 nM) + [WR] <sub>9</sub> (1 µM)  | 101 ± 5                       |
| RFP (50 nM) + [WR] <sub>9</sub> (5 µM)  | 96 ± 4                        |
| RFP (50 nM) + [WR] <sub>9</sub> (10 µM) | 90 ± 2                        |
| RFP (50 nM) + [WR] <sub>9</sub> (15 µM) | 73 ± 2                        |
| RFP (50 nM) + [WR] <sub>9</sub> (20 µM) | 58 ± 2                        |

**Table S3.** Cytotoxicity of [DipR]<sub>5</sub>, [WWRR]<sub>4</sub>, and [WWRR]<sub>5</sub> with GFP (50 nM) at different peptide concentrations (1-10  $\mu$ M) in breast cancer (MDA-MB-231) cell line after 3 h as determined by MTS assay.

| Compound                                       | Cell Viability (%) after 3 h |
|------------------------------------------------|------------------------------|
| Non-treated Cells                              | 100 $\pm$ 1                  |
| GFP (50 nM)                                    | 101 $\pm$ 1                  |
| GFP (50 nM) + [DipR] <sub>5</sub> (1 $\mu$ M)  | 83 $\pm$ 4                   |
| GFP (50 nM) + [DipR] <sub>5</sub> (10 $\mu$ M) | 81 $\pm$ 4                   |
| GFP (50 nM) + [WWRR] <sub>4</sub> (6 $\mu$ M)  | 76 $\pm$ 3                   |
| GFP (50 nM) + [WWRR] <sub>5</sub> (5 $\mu$ M)  | 76 $\pm$ 5                   |

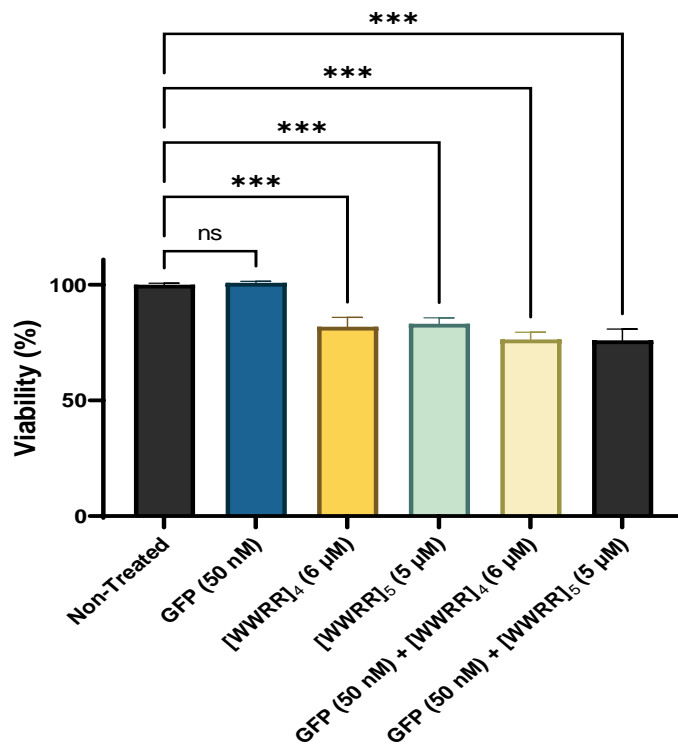

**Figure S1.** Cytotoxicity of cyclic peptides [WWRR]<sub>4</sub>, and [WWRR]<sub>5</sub> with GFP (50 nM) complexes at different peptide concentrations (1-10  $\mu$ M) in breast cancer (MDA-MB-231) cell line after 3 h. Results are mean  $\pm$  SD ( $n$  = 3) (ns; no significance, \*\*\*  $p$  < 0.001 treatments vs. Ctrl (NT)).

**Table S4.** Cytotoxicity of [WR]<sub>9</sub> (3  $\mu$ M) with increasing GFP concentrations (100 nM – 500 nM) in breast cancer (MDA-MB-231) cell line after 24 h as determined by MTS assay.

| Compound                                     | Cell Viability (%) after 24 h |
|----------------------------------------------|-------------------------------|
| Non-treated Cells                            | 100 $\pm$ 1                   |
| GFP (50 nM)                                  | 101 $\pm$ 1                   |
| GFP (100 nM)                                 | 103 $\pm$ 3                   |
| GFP (250 nM)                                 | 102 $\pm$ 2                   |
| GFP (500 nM)                                 | 98 $\pm$ 2                    |
| GFP (50 nM) + [WR] <sub>9</sub> (3 $\mu$ M)  | 100 $\pm$ 3                   |
| GFP (100 nM) + [WR] <sub>9</sub> (3 $\mu$ M) | 100 $\pm$ 6                   |
| GFP (250 nM) + [WR] <sub>9</sub> (3 $\mu$ M) | 96 $\pm$ 5                    |
| GFP (500 nM) + [WR] <sub>9</sub> (3 $\mu$ M) | 95 $\pm$ 7                    |

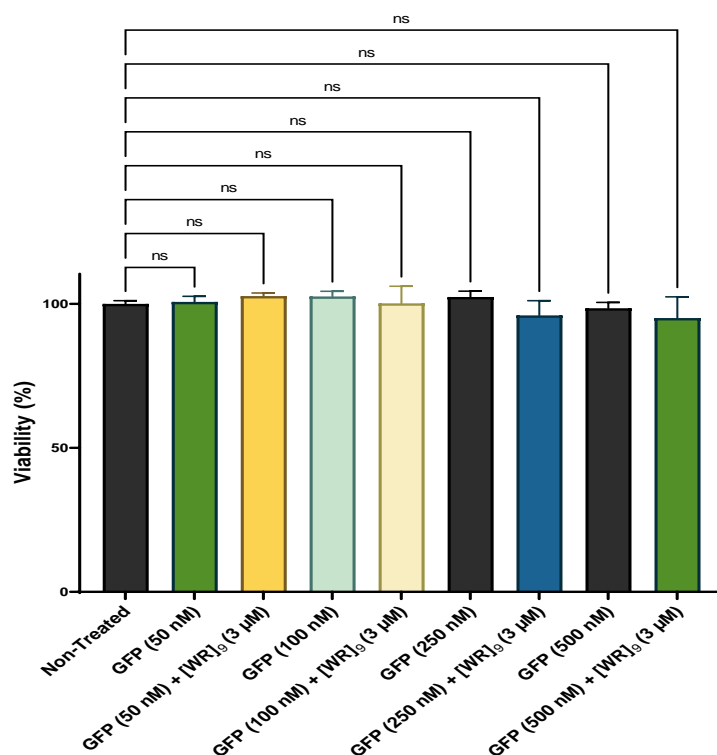

**Figure S2.** Cytotoxicity of [WR]<sub>9</sub> (3  $\mu$ M) with increasing GFP concentrations (100 nM – 500 nM) in breast cancer (MDA-MB-231) cell line after 24 h as determined by MTS assay. Results are mean  $\pm$  SD (n = 3) (ns; no significance) vs. Ctrl (NT).

**Table S5.** Cytotoxicity of [DipR]<sub>5</sub> (10  $\mu$ M) with increasing GFP concentrations (100 nM – 500 nM) in breast cancer (MDA-MB-231) cell line after 3 h as determined by MTS assay.

| Compound                                        | Cell Viability (%) after 3 h |
|-------------------------------------------------|------------------------------|
| Non-treated Cells                               | 100 $\pm$ 1                  |
| GFP (50 nM)                                     | 101 $\pm$ 1                  |
| GFP (100 nM)                                    | 103 $\pm$ 3                  |
| GFP (250 nM)                                    | 102 $\pm$ 2                  |
| GFP (500 nM)                                    | 98 $\pm$ 2                   |
| GFP (50 nM) + [DipR] <sub>5</sub> (10 $\mu$ M)  | 81 $\pm$ 6                   |
| GFP (100 nM) + [DipR] <sub>5</sub> (10 $\mu$ M) | 88 $\pm$ 3                   |
| GFP (250 nM) + [DipR] <sub>5</sub> (10 $\mu$ M) | 91 $\pm$ 7                   |
| GFP (500 nM) + [DipR] <sub>5</sub> (10 $\mu$ M) | 84 $\pm$ 3                   |

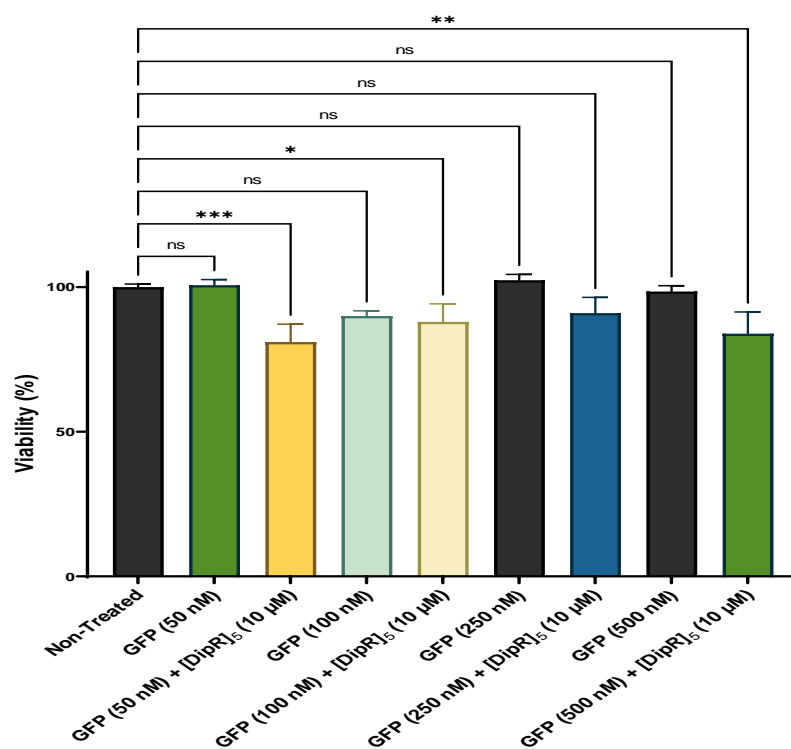

**Figure S3.** Cytotoxicity of [DipR]<sub>5</sub> (10  $\mu$ M) with increasing GFP concentrations (100 nM – 500 nM) in breast cancer (MDA-MB-231) cell line after 3 h as determined by MTS assay. Results are mean  $\pm$  SD (n = 3) (ns; no significance, \*  $p < 0.05$ , \*\*  $p < 0.01$ , \*\*\*  $p < 0.001$  treatments vs. Ctrl (NT)).



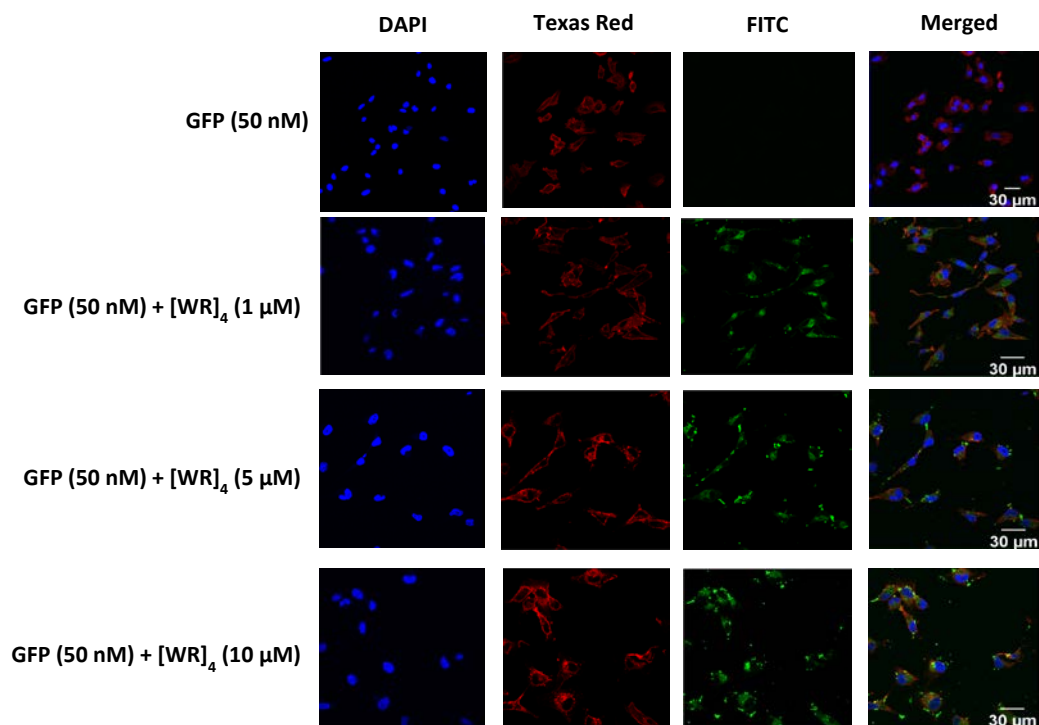

**Figure S4.** Confocal microscopy images of MDA-MB-231 cells incubated with GFP-[WR]<sub>4</sub> mixture at a peptide concentration ranging (1-10 μM) and GFP at (50 nM) for 3 h. The red, blue, and green channels visualize Texas Red (used to stain the cellular cytoskeleton), DAPI (used to stain the nucleus), and GFP, respectively.

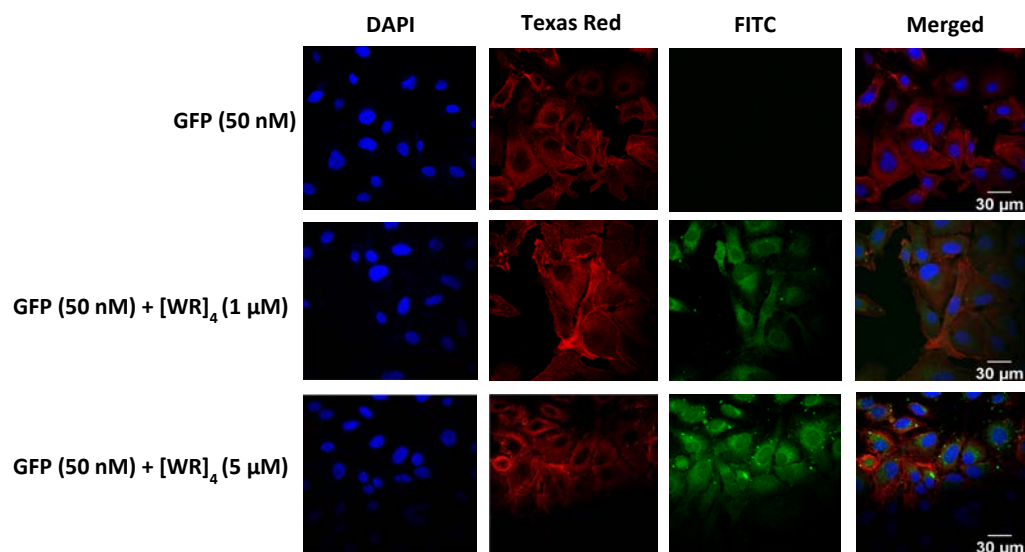

**Figure S5.** Confocal microscopy images of SK-OV-3 cells incubated with GFP-[WR]<sub>4</sub> mixture at a peptide concentration ranged (1-5 μM) and GFP at (50 nM) for 3 h. The red, blue, and green channels visualize Texas Red (used to stain the cellular cytoskeleton), DAPI (used to stain the nucleus), and GFP, respectively.

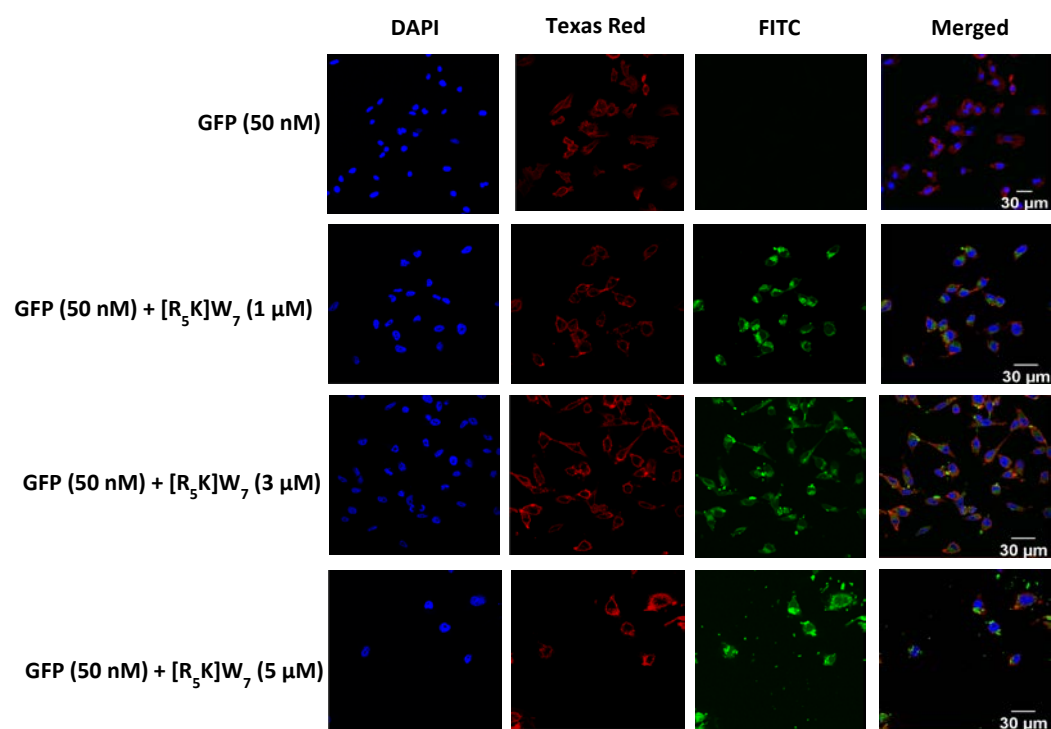

**Figure S6.** Confocal microscopy images of MDA-MB-231 cells incubated with GFP-[R<sub>5</sub>K]W<sub>7</sub> mixture at a peptide concentration ranged (1-5 μM) and GFP at (50 nM) for 3 h. The red, blue, and green channels visualize Texas Red (used to stain the cellular cytoskeleton), DAPI (used to stain the nucleus), and GFP, respectively.

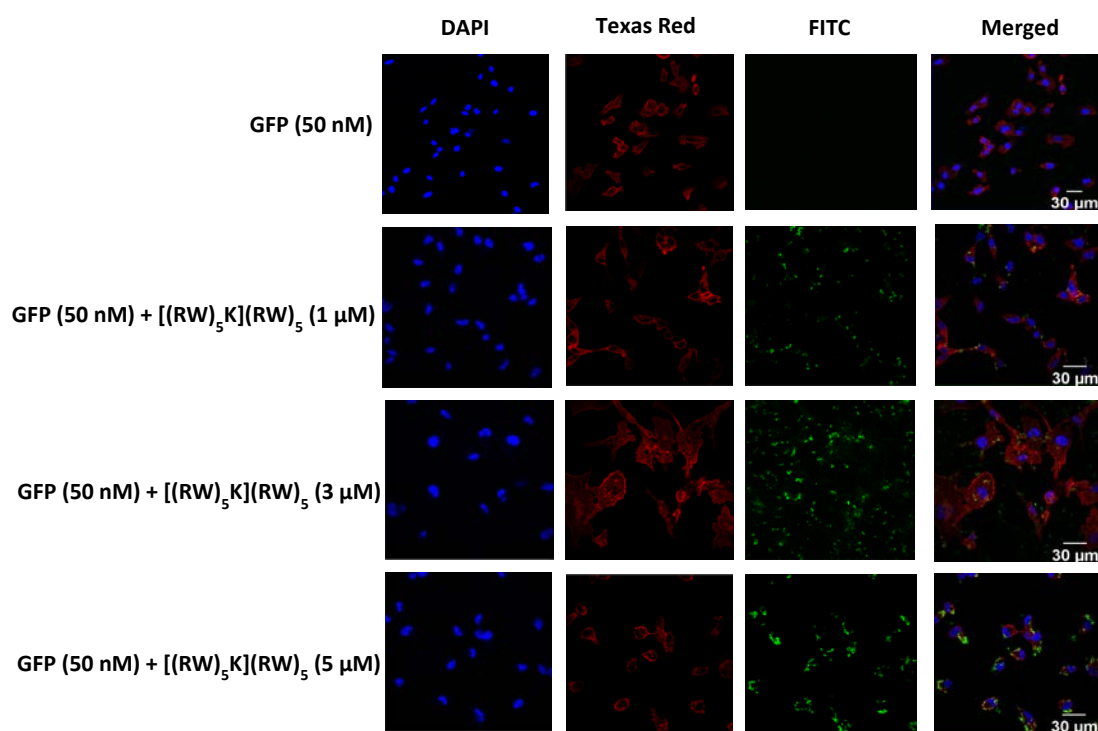

**Figure S7.** Confocal microscopy images of MDA-MB-231 cells incubated with GFP-[(RW)<sub>5</sub>K](RW)<sub>5</sub> mixture at a peptide concentration ranged (1-5 μM) and GFP at (50 nM) for 3 h. The red, blue, and green channels visualize Texas Red (used to stain the cellular cytoskeleton), DAPI (used to stain the nucleus), and GFP, respectively.

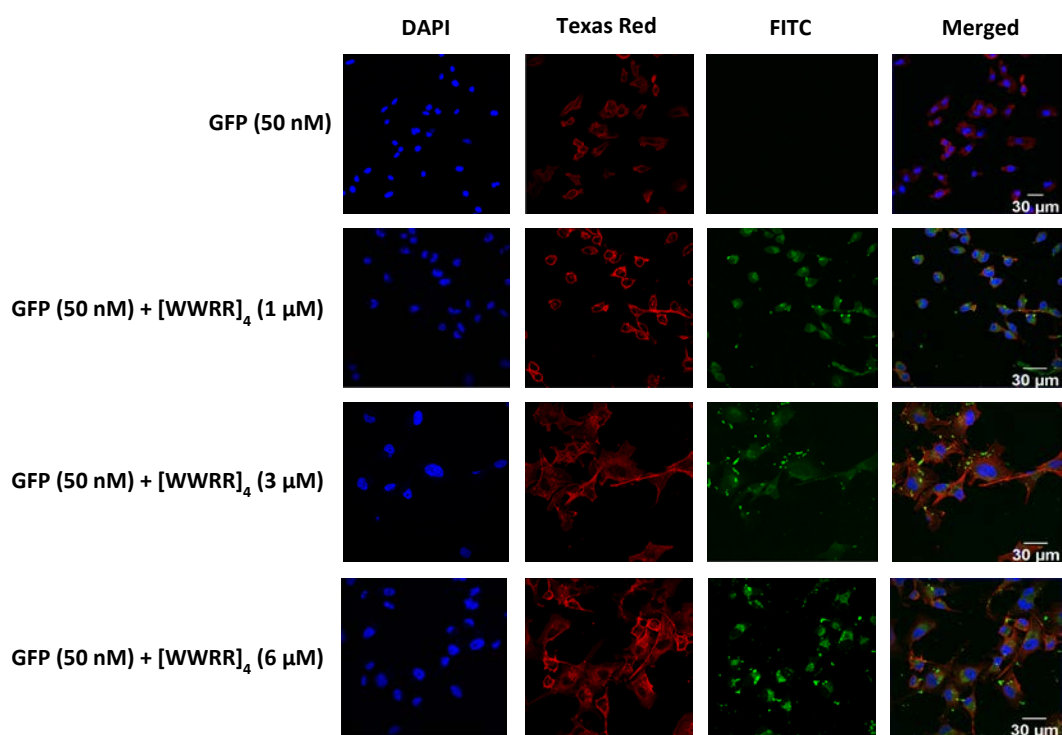

**Figure S8.** Confocal microscopy images of MDA-MB-231 cells incubated with GFP-[WWRR]<sub>4</sub> mixture at a peptide concentration ranging (1-6 μM) and GFP at (50 nM) for 3 h. The red, blue, and green channels visualize Texas Red (used to stain the cellular cytoskeleton), DAPI (used to stain the nucleus), and GFP, respectively.

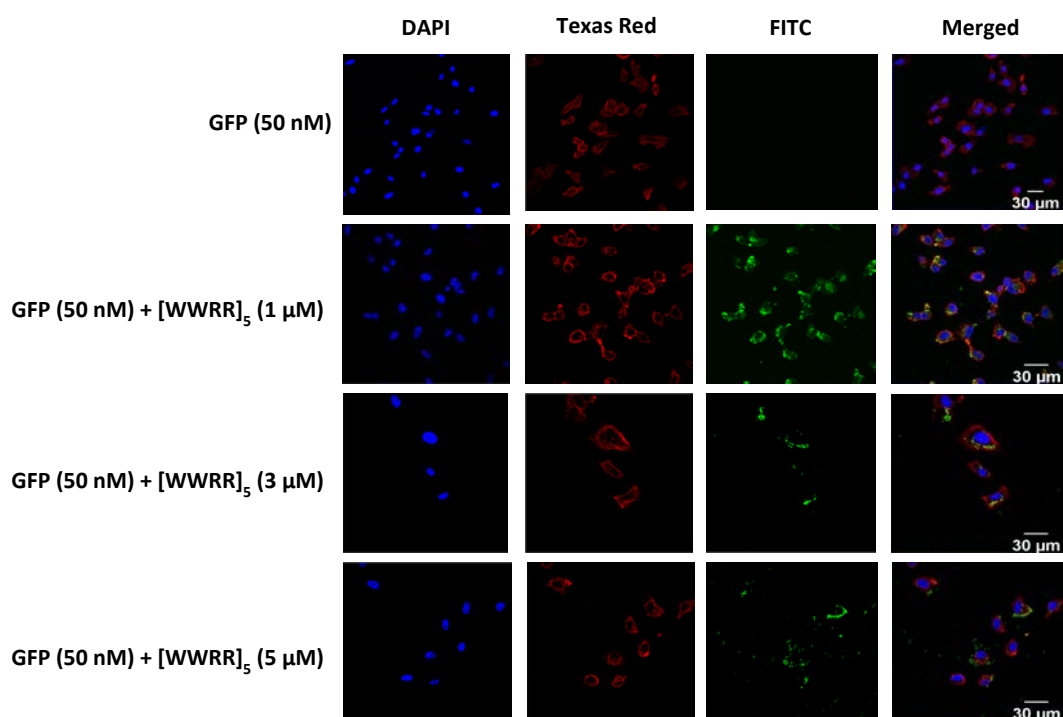

**Figure S9.** Confocal microscopy images of MDA-MB-231 cells incubated with GFP-[WWRR]<sub>5</sub> mixture at a peptide concentration ranging (1-5 μM) and GFP at (50 nM) for 3 h. The red, blue, and green channels visualize Texas Red (used to stain the cellular cytoskeleton), DAPI (used to stain the nucleus), and GFP, respectively.

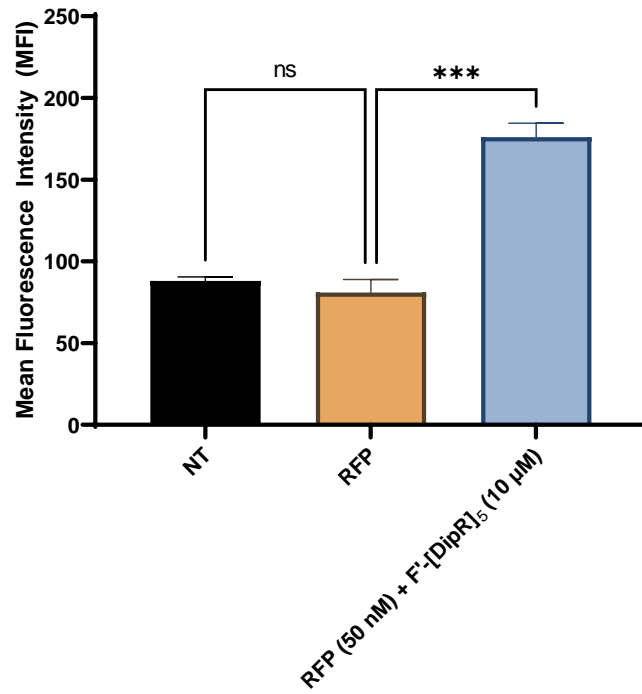

**Figure S10.** Improved delivery of RFP (50 nM) by F'-[DipR]<sub>5</sub> in MDA-MB-231 cells. Results are mean  $\pm$  SD (n = 3) (ns; no significance, \*\*\* $p$ <0.001), treatment vs. Ctrl (RFP alone).

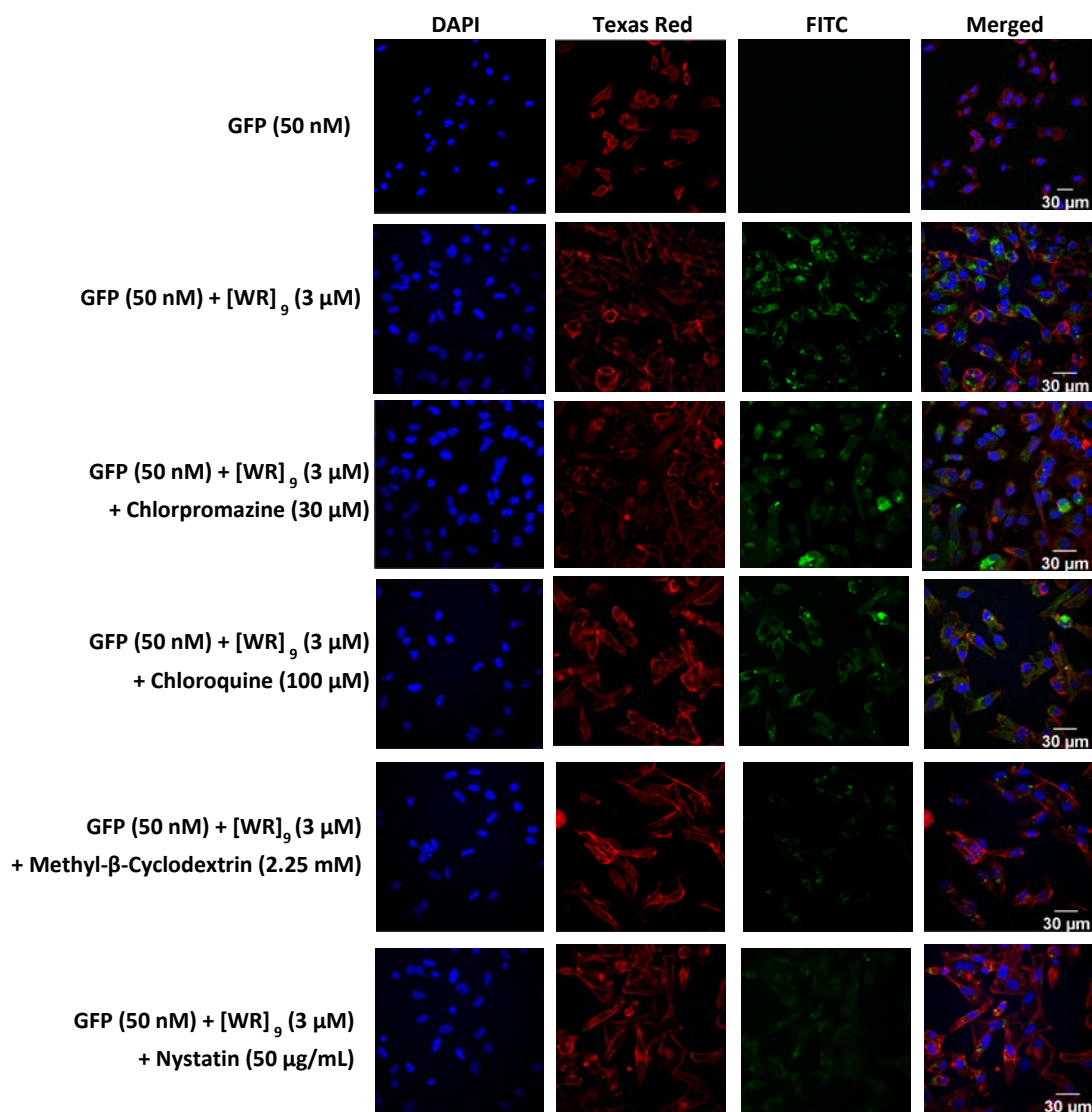

**Figure S11.** Cellular uptake study of GFP (50 nM) with [WR]<sub>9</sub> in the presence of endocytosis inhibitors in MDA-MB-231 cells after 3 h incubation. The red, blue, and green channels visualize Texas Red (used to stain the cellular cytoskeleton), DAPI (used to stain the nucleus), and GFP, respectively.



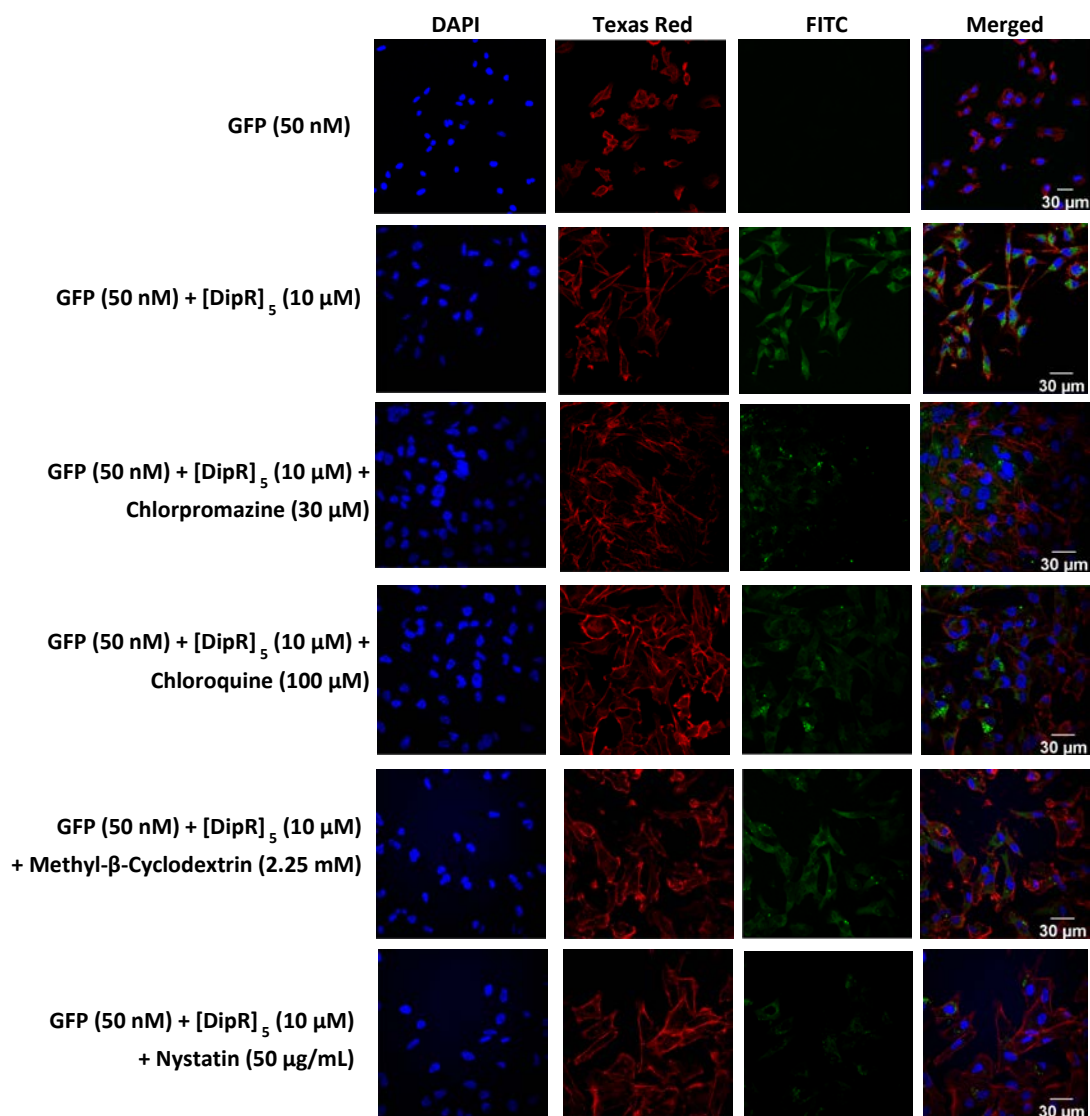

**Figure S12.** Cellular uptake study of GFP (50 nM) with [DipR]<sub>5</sub> in the presence of endocytosis inhibitors in MDA-MB-231 cells after 3 h incubation. The red, blue, and green channels visualize Texas Red (used to stain the cellular cytoskeleton), DAPI (used to stain the nucleus), and GFP, respectively.
